# Supplementary material for: Effects of decimetre-scale surface roughness on L-band Brightness Temperature of Sea Ice
Source: Copernicus journal article supplement (doi:10.5194/tc-2019-110), 2019-06-03

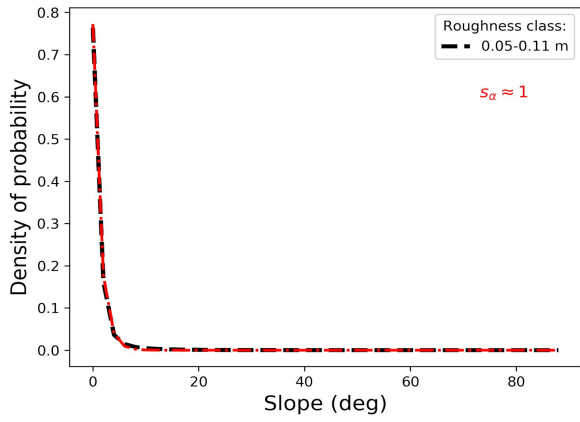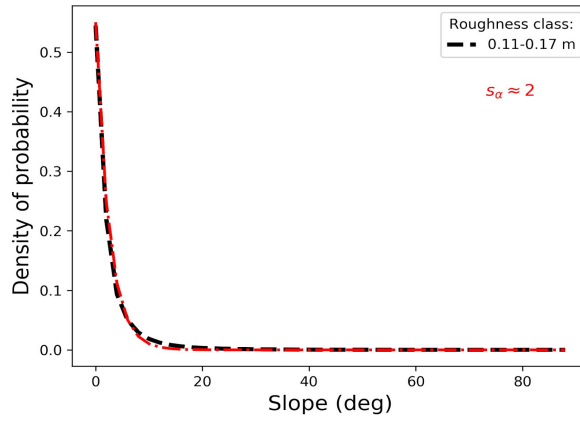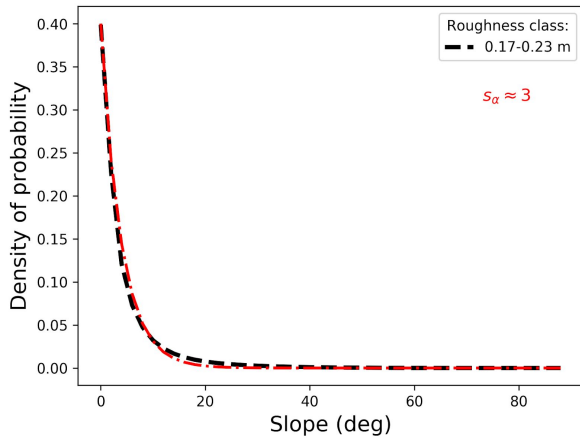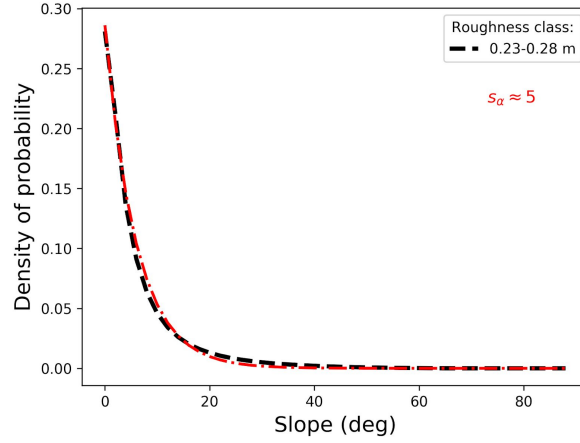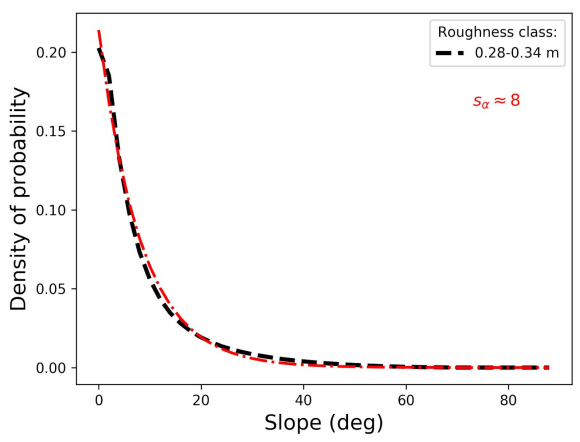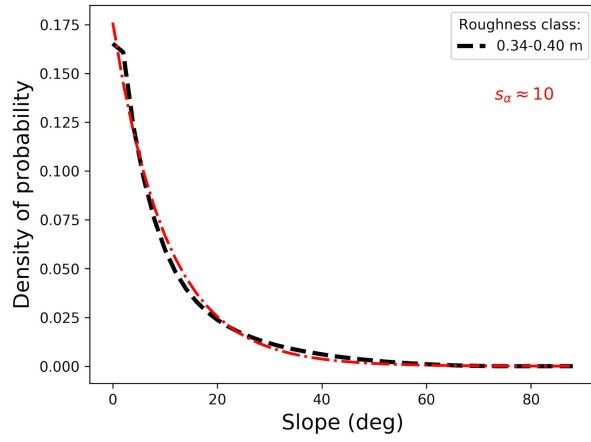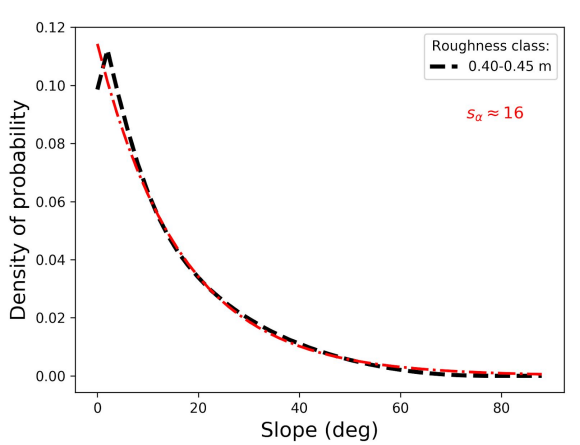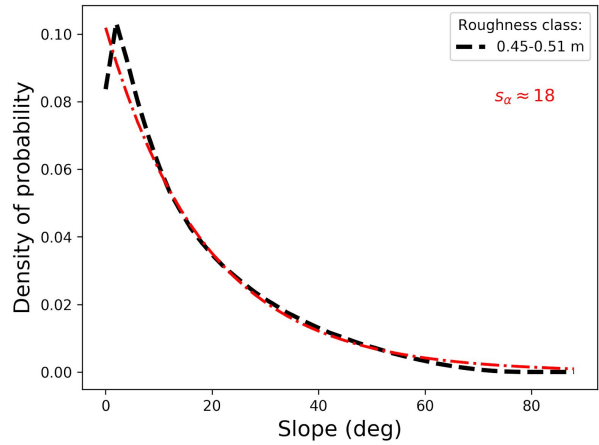

Supplement: Supplementary file [file tc-2019-110-AC3-supplement.pdf]
